1 **Topic: Hyper immune Bovine Colostrum as a Low-Cost, Large-Scale Source**  
2 **of Antibodies against COVID-19**

3 **Hassan Nili<sup>1,2</sup>, Majid Bouzari<sup>1</sup>, Hamid Reza Attaran<sup>1</sup>, Nader Ghaleh Golab<sup>3</sup>, Mohammad**  
4 **Rabani<sup>1</sup>**

5 **<sup>1</sup>Virology Research Center, University of Isfahan, Isfahan, Iran**

6 **<sup>2</sup> Zeitoun Isfahan Vaccine Innovators Company, Isfahan Sciences and Technology Town,**  
7 **Isfahan, Iran**

8 **<sup>3</sup>Razi Serum and Vaccine Research Institute- Shiraz Branch, Shiraz, Iran**

9 **Corresponding author:**

10 **Hassan Nili, [nili@shirazu.ac.ir](mailto:nili@shirazu.ac.ir)**

11

12 **Abstract:**

13 Many different strategies have been used to fight against COVID-19 pandemic as a  
14 therapeutics or prophylaxis approaches. However, none of them so far have used,  
15 passive immune transfer using products from immunized farm animals. Hyper  
16 immune bovine colostrums (HBC) have been used against many different  
17 respiratory and gastrointestinal tracts infections during past decades.

18 Six mixed Holstein X Semental dairy cattle's in their 6-7 months of gestation  
19 period years were chosen for hyper immunization with COVID-19 vaccine. An  
20 isolated and very well protected site was selected and equipped according to  
21 animal husbandry code of practice, used for animal experimentation. Specific IgG  
22 level against SARS-CoV-2 virus was measured before and after vaccination in the  
23 sera, and in the colostrum following parturition. Very high specific IgG level was  
24 detected one week following second vaccination in the sera and in first colostrums  
25 after parturition. Safety of the product was approved following phase 1 of clinical  
26 trials in 40 healthy volunteers. Phase 2 of the clinical trials is underway. Early  
27 results show effectiveness of the product in reducing sore throat and cough in early  
28 stages of SARS-CoV-2 infection.

29 **Keywords:** COVID-19, Hyper immune Bovine Colostrum,

## **Introduction:**

31  
32 The emergence of severe acute respiratory syndrome coronavirus 2 (SARS-CoV-2)  
33 has caused severe human respiratory infection (COVID-19) and has become more  
34 than global health crisis (1, 2). It had devastating effects on all aspects of life, from  
35 increasing family violence's and abuses, to having catastrophic effects on world  
36 economy (3). On January, 2020, the World Health Organization announced that  
37 outbreak of SARS-CoV-2 is a public health emergency with international concern  
38 (4). Coronaviruses belong to the family of Coronaviridae, an enveloped virus with  
39 positive-stranded RNA (5). It contains four main structural proteins: spike (S)  
40 glycoprotein, envelope (E), membrane (M) and nucleocapsid (N). According to  
41 genetic analysis, SARS-CoV-2 is related to bats and pangolin coronavirus which  
42 place this virus in the Beta coronavirus, indicating that the origin of SARS-CoV-2  
43 may be bats Coronavirus (BatCoV RaTG13), and pangolin may be the  
44 intermediate host (6, 7).

45 COVID-19 outbreaks showed that achievement of efficient vaccines are out of  
46 hand, especially in the early stages pandemic. Using animal models for production  
47 of large amount of specific antibodies could be used as an alternative approach  
48 against circulating pathogen during the pandemic, especially in immune  
49 compromised patients. Although passive immune transfer using convalescence

50 plasma therapy have shown not to be clear in reducing mortalities in COVID-19  
51 patients, there is no report on the efficacy of HBC in treatment of covid-19  
52 patients(8). By hyper immunization of pregnant dairy cows in the late gestation  
53 periods using specific antigens, the concentration of specific immunoglobulins in  
54 the sera could be increase. Passive immunity from ingestion of colostrum and milk  
55 is essential for the survival of newborn animals. Therefore, it has been proved that  
56 vaccination of pregnant cows before calving can effectively prevent infection of  
57 newborn calves.

58 Antibodies level specially IgG1 will be reduced in the blood stream 2-3 wks before  
59 partition and actively will be transported through receptor mediated mechanism to  
60 the lacteal secretion, following parturition (9). The total amount of IgG1 obtained  
61 from each lactation could be as high as of 500 grams (9, 10). Oral HBC and milk  
62 not only can increase the mucosal immunity in the oral cavity, pharynx and upper  
63 respiratory tract of human, even could have immunomodulatory effects on the host  
64 immune system. Passive immunity caused by immunoglobulin transfer is a well  
65 known concept adopted by most mammals. IgG is one of the main components of  
66 immune activity found in milk and colostrums which can bind to many  
67 gastrointestinal and respiratory pathogens that infect humans such as  
68 Cryptosporidiosis, Shigellosis, Rotavirus, Respiratory Syncytial Virus (RSV),  
69 Human immunodeficiency Virus (HIV), Influenza, Enterotoxigenic *Escherichia*

70 *coli*, and *Clostridium difficile* infection and support the cross-species activity of  
71 bovine and human IgG (11-19).

72 Immunoglobulins in breast milk are IgA, IgG1, IgG2 and IgM. On the contrary,  
73 IgG1 is the main immunoglobulin in cow's milk, especially colostrum, while the  
74 concentration of IgM, IgA and IgG2 are lower (20). The concentration of IgG1 in  
75 colostrum is 100 times higher than milk (21). Beside specific antibodies, bovine  
76 colostrum contains many essential nutrients and bioactive components, including  
77 growth factor, immunoglobulin (Igs), lactoperoxidase (LP), lysozyme (Lys),  
78 lactoferrin (LF), cytokines, nucleosides, vitamins, peptides and oligosaccharides.  
79 These components are increasingly related to human health. IgG from  
80 unimmunized cattle can interact with different types of pathogens including  
81 viruses. Interestingly, bovine IgG can interact with the human Fcγ receptor (FcγR),  
82 which can enhance antigen presentation to T-cells and phagocytosis of leukocytes  
83 (21, 22).

84 An experimental research showed that bovine colostrum increased the proportion  
85 of CD8<sup>+</sup> T-cells after virus attack in mice(16). IgG also has other functions,  
86 including agglutinating pathogens, fixing complement to lysis pathogens,  
87 inhibiting pathogen metabolism by blocking enzymes, and neutralizing viruses.  
88 Bovine colostrum-derived IgG can inhibit the NF-κB signaling pathway and inhibit  
89 the production of pro-inflammatory cytokines in intestinal cells(23). Hyper

90 immune bovine IgG can directly bind to the virus and prevent pathogen organisms  
91 from adhering to intestinal epithelial cells (17, 24, 25).

92 Consistent with this study, treatment of mice with immune IgG produced by cows  
93 immunized with LPS is associated with an increase in the number of NKT cells in  
94 the spleen, indicating that oral administration of hyper immune colostrum  
95 preparations can reduce chronic inflammation, including liver damage(26).

96 It has been reported that bovine IgG-derived colostrum is resistant to proteolysis,  
97 which supports the view that IgG-derived colostrum contains trypsin inhibitors,  
98 which can promote these antibodies survive throughout the gastrointestinal tract  
99 (27, 28).

100 In a group of high-risk cardiovascular patients, the effect of oral colostrum on  
101 hospital flu-related complications was studied. These patients received only  
102 colostrum, colostrum combination vaccination or single vaccination. Compared  
103 with the colostrum-only group, flu-related complications in the colostrum-only  
104 group were significantly reduced (29). In addition, colostrum prevents influenza  
105 infection in healthy volunteers at a rate equivalent to influenza vaccination (29).

106 Therefore, considering previous work on prophylactic and therapeutic effects of  
107 bovine colostrums derived immunoglobulin's on different infectious organisms, we  
108 have used similar approach against COVID-19 infection. This research focuses on

109 passive immunization and how hyper immune milk or colostrum collected from  
110 cows vaccinated with SARS-CoV-2 can be used to provide short-term protection  
111 against SARS-CoV-2 infection in humans. And can be used as an alternative  
112 method of immunization specially in more vulnerable individuals and as a  
113 prophylaxis in health care staffs. By this approach large scale and low cost  
114 production of immune components can be achieved to confront pandemic such as  
115 SARS-CoV-2.

116

117 **Results:**

118 **Clinical observation**

119 Veterinary and laboratory check out of the pregnant animals and their fetus used in  
120 this experiment, did not show any abnormalities before and after vaccination. At  
121 least 3 doses of 2 ml vaccines were used for each animal immunization before  
122 parturition. No any changes were observed in the behavior and clinical signs such  
123 as body temperature, feed and water consumption of vaccinated pregnant animals.  
124 Also, adverse tissue reactions were not detected on the injection site in the thigh  
125 muscle after vaccination.

126 **ELISA results**

127 As it is shown in table 1, three of the cattle had their forth vaccination before  
128 parturition. In three others, only three vaccine injection conducted, two of which  
129 delivered their calf few days after third vaccine injection. IgG level in the serum of  
130 six pregnant bovine raised following first vaccinations; however we observed  
131 highest IgG level increase one week after second vaccination (figure 1). Third and  
132 forth injection did not changed IgG level, compared to second vaccination.

133 **Virus neutralization:** The virus was successfully neutralized by antibody present  
134 in the sera.

135



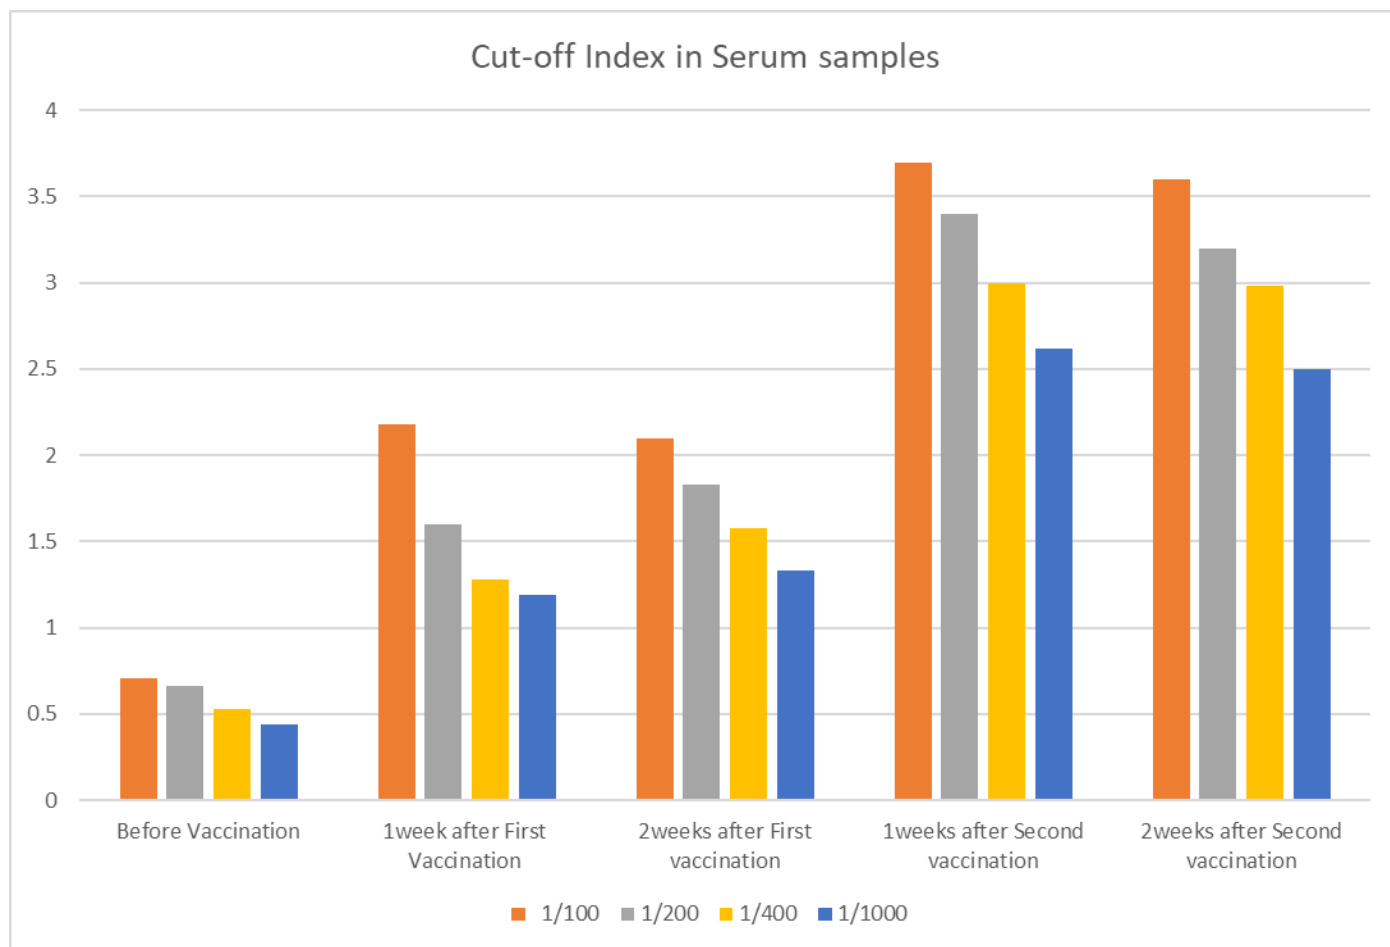

136

137 Figure 1: Mean specific IgG level in different serum dilutions of six pregnant cows  
138 before and after first and second vaccination, using ELISA test. Light absorbent by  
139 bovine IgG was measured at 450 & 630 wavelengths.

140 As it is shown in figure 2 high level of mean specific IgG is shown even in lowest  
141 dilution of the first colostrums (1/1000).

142

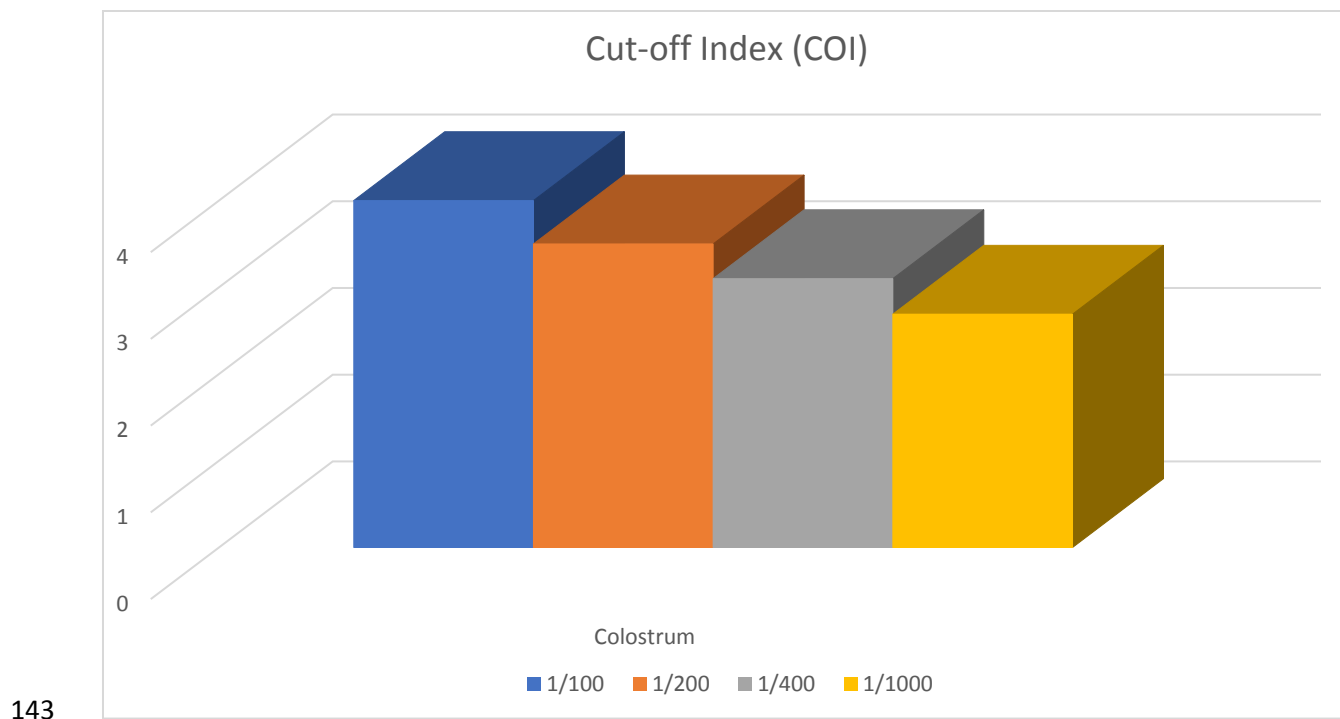

144 Figure 2. Mean specific IgG level in different colostrums dilutions of six cows,  
145 using ELISA test. Light absorbent by bovine IgG was measured at 450 & 630  
146 wavelengths.

147

148 Comparison of dynamism of specific IgG level (mean) between serum collected  
149 before parturition, at parturition, first colostrums and milk obtained seven days  
150 following parturition in six pregnant cows are presented in figure 3. As indicated,  
151 there is a very sharp increase in specific IgG level against COVID-19 virus,  
152 following second vaccination. Just before parturition, IgG level sharply decreases  
153 in the serum and after parturition similar increase of IgG level has been observed  
154 in the first colostrum.

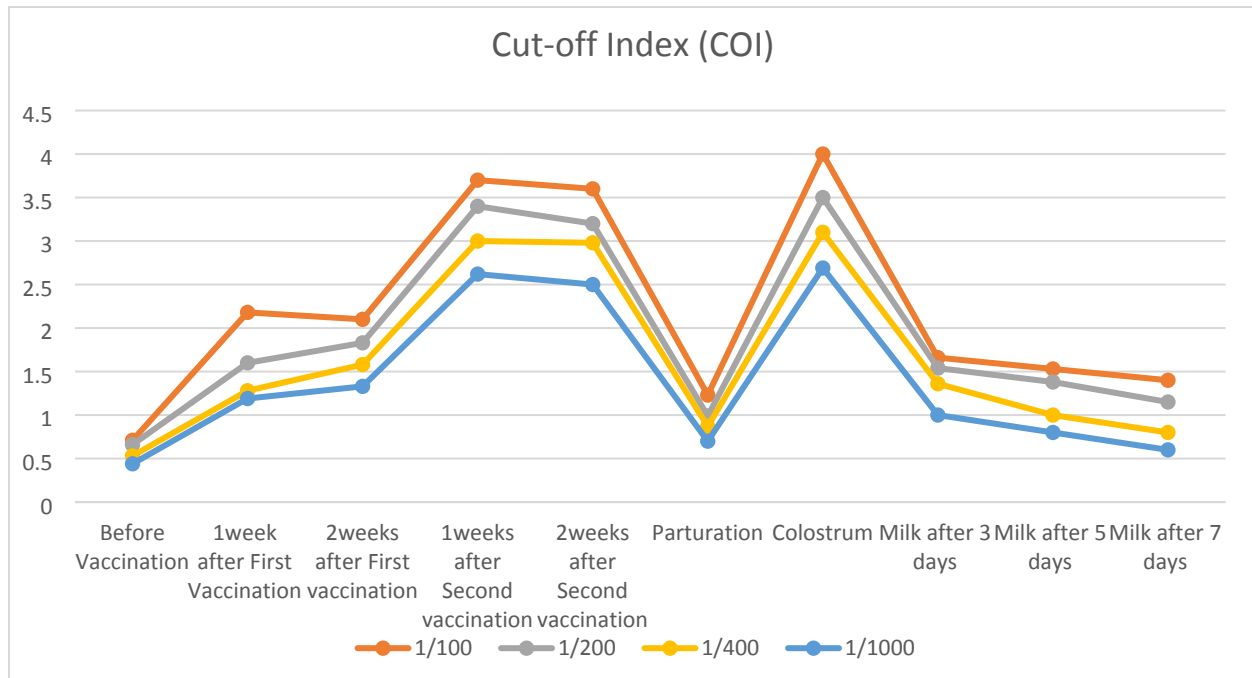

155

156 Figure 3. Dynamism of specific mean IgG level against covid-19 virus, in different  
157 dilutions, between serum collected before parturition, at parturition, first  
158 colostrums and milk obtained seven days following parturition in six pregnant  
159 cows, used in this study. Light absorbent by bovine IgG was measured at 450 &  
160 630 wavelengths in ELISA test.

161

162 Clinical trial phase 1: there were no any adverse effects following frequent use of  
163 hyper immune bovine milk and colostrums in healthy volunteers, containing  
164 specific antibody against SARS covid-19 virus. Therefore the safety of the product  
165 was officially approved by ethic committee for research in biological sciences of  
166 Isfahan University of Medical Sciences.

167 Clinical trial phase 2: This clinical trial is still underway.

168

## 169 **DISCUSSION:**

170 Vaccinated pregnant cows behaved normally following vaccination and did not  
171 show any clinical signs and mortalities, there was no abortion, fever or changes in  
172 feed and water consumption, and any tissue reaction in the vaccination site.

173 Although many FDA-approved and investigational anti-viral drugs, alone or in  
174 combination, are in use during the ongoing SARS covid-19 pandemic, none of the  
175 clinical trials so far have used bovine colostrums based immune components  
176 against COVID-19 (30). Considering the safety of the product which has been  
177 approved following conducting phase1 clinical trial during this study,  
178 immunomodulatory effects of the product can be studied in different stages of the  
179 disease and even as a prophylaxis, especially in health care workers, in front line of  
180 fighting covid-19 virus pandemic. Personal observations during last three months

181 using hyper immune bovine milk and colostrums show that the products are  
182 efficacious especially in early stages of infection. Passive immune transfer using  
183 bovine immunoglobulin has been used in many respiratory and gastrointestinal  
184 tracts infections during last two decades. For more than 100 years it has been  
185 recognized that milk and maternal antibody provide passive immunity to a  
186 newborn infant via the transfer of bioactive factors and immunoglobulin's (Igs)  
187 (31). Unique physiology of antibody transfer from mother to neonate in ruminants,  
188 which is through colostrum, has provided us, with massive amounts of antibody,  
189 immediately after parturition (9). This phenomenon provides very valuable  
190 immune components, with wide range of use in human health and medicine. By  
191 hyper immunization of pregnant cows in their late gestation period, we can  
192 increase the specificity of immune components that are available to us after  
193 parturition.

194 Perhaps because of this unique function, ruminant neonates are borne without Igs  
195 and 70-80 percent of total protein content in their colostrums is Igs (32, 33).

196 The results of current study show that the IgG level starts to decline 2-3 weeks  
197 before parturition, and this is because of active receptor mediated transfer of the  
198 antibody from blood stream to the mammary glands. These results are in  
199 agreement with previous research by Burton *et al* (9).

200 The level of IgG in the blood stream did not increased much after 3<sup>rd</sup> and 4<sup>th</sup>  
201 vaccination, this could be due to limited time period before parturition, as  
202 explained before, therefore in future study, we propose to use pregnant cow in their  
203 earlier gestation period, so there would enough time for evaluation of consequent  
204 antibody response 3<sup>rd</sup> and 4<sup>th</sup> vaccine injection.

205 High IgG level obtained even in the lowest dilution of the sera and colostrum,  
206 indicates that the vaccine used in this study has been able to show very good  
207 humeral immunity response in vaccinated cattles.

208 In addition to currently approved antiviral therapies, passive transfer of immune  
209 components through oral routs in dairy products could be an alternative strategy  
210 against the virus (16, 34). Although several new therapeutic strategies are  
211 emerging in these desperate times, none of them are based on specific bovine  
212 derived immunoglobulin's.

213 Vaccination or passive immune transfer strategies both can be used in fighting  
214 COVID-19 infection. Each one has its own advantage and disadvantages,

215 Although vaccination is more popular and well-established strategy against  
216 infectious diseases, technical difficulties in conducting different clinical trials  
217 needed for achieving efficient, potent and safe vaccine are obstacles. Moreover,  
218 there is delayed antibody response after vaccination, considering the fact that the

219 immune system of the host is functional and the response is appropriate. Using oral  
220 immune transfer strategy, will not have any contradiction with injecting vaccines,  
221 also the clinical trials for oral immune transfers are more practical and steadfast.

222 This idea dates back to the 1950s when Petersen and Campbell proposed that orally  
223 administered bovine colostrum from hyperimmunized cows could provide passive  
224 immune protection for humans(35).

225 Currently, the US Food and Drug Administration (FDA) have accepted the safety  
226 of hyperimmune milks on the basis of clinical studies that show no adverse health  
227 effects from these products(36, 37).

228 Phase one of the clinical trial was conducted to determine the safety of hyper  
229 immune bovine milk against COVID-19, using 150 ml on daily basis for up to 30  
230 consequence days did not have any adverse effects in healthy volunteers aged  
231 between 18-65 years. In an ongoing phase II of clinical trial, some efficiency have  
232 been observed from anti-COVID-19 milk using 150ml of hyper immune milk.

233 **In conclusion,** In current COVID-19 and future pandemics, beside vaccination  
234 which is a very time consuming and complicated process, especially in the early  
235 stages, by passive immune transfer, using bovine hyper immune milk and  
236 colostrums large amount of specific abs could be available for prophylactic and  
237 therapeutic proposes (12, 13).

238 **Materials and Methods:**

239 Six mixed Holstein X Semental in their 6-7 months of gestation period aged  
240 between 3-4 years were chosen for hyper immunization with COVID-19 vaccine.  
241 Before purchase, cows were tested for Brucellusis and bovine Tuberculosis by  
242 local governmental veterinary organization. Also their health status and stage of  
243 gestation were examined by dairy farm veterinary specialist. An isolated and very  
244 well protected dairy farm was equipped and selected for the experiment in  
245 Zardanja area in East of city of Isfahan-Iran. Animal were kept under close daily  
246 observation for adaptation to the new environment. An experienced animal  
247 husbandry engineer was employed for supervision of dairy cows during the  
248 experiment. Special Diet for dry period was purchased from Vahdat Company in  
249 the city of Isfahan.

250 **Vaccine preparation**

251 This vaccine was produced according to the protocol of influenza vaccine  
252 production and FDA approved adjuvant was used as well. Briefly, the virus was  
253 isolated from the naso-pharynx samples taken from COVID-19 positive patients,  
254 cultured on **WHO** Vero cell line. The presence and purity of COVID-19 virus was  
255 checked by RT-PCR, Nano-Sensor and serum neutralizing tests(38). Each ml of  
256 the vaccine was contained  $5 \times 10^{8.3}$  inactivated viral particles of COVID-19 virus.



257 For viral inactivation formaldehyde was used according to the protocol. To check  
258 inactivating test, in proper laboratory animals' model such as mouse and rat and  
259 Syrian hamster (39, 40) in groups of five, no virus was detected from pharyngeal  
260 swabs and blood samples for at least 2-month post inoculation, also no any clinical  
261 signs detected in all lab animals. Quality control tests for bacterial contamination  
262 such as blood agar, nutrient broth, thioglycollate broth, PPLO broth at 37°C,  
263 Sabouraud dextrose agar at 25°C were conducted on the harvested virus as well as  
264 vaccine.

265

266 **Hyper immunization**

267 Animal experimentation was approved by ethic committee of the University of  
268 Isfahan. Animals were vaccinated with 2 ml of COVID-19 vaccine intramuscular  
269 in thigh muscle according to the vaccination schedule presented in the table 1.

270 Table 1: Vaccination time table of six pregnant mixed breed of dairy cattle in their  
271 late gestation period.

| Cow No | Vaccination date |                 |                 |                 |
|--------|------------------|-----------------|-----------------|-----------------|
|        | 1 <sup>st</sup>  | 2 <sup>ed</sup> | 3 <sup>rd</sup> | 4 <sup>th</sup> |
| 1      | 14 Aug.          | 28 Aug          | 16 Sept         | 25 Oct          |
| 2      | 18 Aug           | 1 Sep           | 16 Sept         | 25 Oct          |
| 3      | 24 Sep           | 10 Oct          | 25 Oct          | 25 oct          |
| 4      | 11 Nov           | 23 Nov          | 9 Dec           | N/A             |
| 5      | 11 Nov           | 23 Nov          | 9 Dec           | N/A             |
| 6      | 11 Nov           | 23 Nov          | 9 Dec           | N/A             |

272

273 **Clinical observation**

274 Before and after vaccination, pregnant cows were closely monitored on daily basis  
275 for any changes in behavior such as occasional systemic shock, itching, swelling or  
276 any adverse effects in the vaccination site in the thigh muscle. Also, they were

277 monitored for any change in water and feed consumption, restlessness, increase in

278 body temperature.

279

## 280 **Blood samples**

281 All laboratory experiments were conducted in the Virology Research Center of  
282 University of Isfahan in conjunction with Zeitoon Isfahan Vaccine Innovators  
283 Company's facilities. Blood samples were collected on weekly intervals from milk  
284 vein of the animal into special serum tubes, kept in room temperature for 30 min to  
285 coagulate red blood cells, and then centrifuged at 2500 g for 15 min at room  
286 temperature. Serum was removed and stored in aliquots at -20 C before use.

## 287 **Preparation of colostrum and purified colostrum IgG.**

288 HBC was collected immediately after parturition, quickly were pasteurized at 60°C  
289 for at least 60 mins. (Low temperature long time, LTLT). After pasteurization, the  
290 colostrums temperature brought to 4° C, then transferred to the laboratory, frozen  
291 at -20° C , until use.

## 292 **ELISA**

293 Enzyme-linked immunosorbent assay (ELISA) was used for specific IgG  
294 measurement in the sera and supernatant obtained after centrifugation of  
295 colostrums after removal of fat and precipitant. Frozen colostrums were melt,  
296 centrifuged at 11000 g for 15-30 min at 4° C. protocols have been done according  
297 to ELISA Kit SARS-CoV-2 IgG (Pishtazteb, Iran). We just changed the secondary  
298 antibody and for this step horseradish peroxidase (HRP)-conjugated rabbit anti-

299 bovine IgG antibody (Sigma) was used. In ELISA plate reader light absorbent by  
300 bovine IgG was measured at 450 & 630 wavelength. According to ELISA kit used  
301 in this experiment the Cut off value and Cut of index are obtained from the  
302 following formula.

303  $\text{Cut off value} = \text{mean of light absorbent of negative controls} + 0.15$

304  $\text{Cut off index (COI)} = \text{OD of sample/cut-off value}$

305 **Viral neutralization test:** Viral neutralization test was conducted in bio-safety  
306 level-3 laboratory at "Razi vaccine and Serum Research institute" of Iran.

307 **Phase 1 of clinical trials** in at least 40 healthy volunteers, aged between 18-60  
308 years, with no back ground medical complications has been conducted under the  
309 supervision of ethical committee for research projects in biological sciences with  
310 ethical code of IR.MUI.REC.1399.672, of Isfahan University of Medical Sciences.  
311 Each individual signed the consent form before entering phase 1 of clinical trials.  
312 Volunteers were given 150 ml of hyper immune bovine milk for up to 30  
313 consequent days.

314 **Phase 2 of clinical trials.** A randomized double blind placebo controlled clinical  
315 trials including 40 hospitalized patients diagnosed by PCR and lung city scan to be  
316 positive for covid-19 in two hospitals affiliated to Isfahan University of medical  
317 Sciences is underway. Patients not having blood O<sub>2</sub> saturation less than 90% were

318 given 150 ml of hyper immune bovine milk or placebo twice on daily basis for 5  
319 consequent days.

## 321 References:

322

- 323 1. Jawhara S. Could Intravenous Immunoglobulin Collected from Recovered Coronavirus Patients  
324 Protect against COVID-19 and Strengthen the Immune System of New Patients? *International journal of*  
325 *molecular sciences*. 2020;21(7).
- 326 2. Lin L, Lu L, Cao W, Li T. Hypothesis for potential pathogenesis of SARS-CoV-2 infection-a review  
327 of immune changes in patients with viral pneumonia. *Emerging microbes & infections*. 2020;9(1):727-32.
- 328 3. Campbell AM. An increasing risk of family violence during the Covid-19 pandemic: Strengthening  
329 community collaborations to save lives. *Forensic Science International: Reports*. 2020;2:100089.
- 330 4. Sohrabi C, Alsafi Z, O'Neill N, Khan M, Kerwan A, Al-Jabir A, et al. World Health Organization  
331 declares global emergency: A review of the 2019 novel coronavirus (COVID-19). *International journal of*  
332 *surgery (London, England)*. 2020;76:71-6.
- 333 5. Li F. Structure, Function, and Evolution of Coronavirus Spike Proteins. *Annual review of virology*.  
334 2016;3(1):237-61.
- 335 6. Hu D, Zhu C, Ai L, He T, Wang Y, Ye F, et al. Genomic characterization and infectivity of a novel  
336 SARS-like coronavirus in Chinese bats. *Emerging microbes & infections*. 2018;7(1):154.
- 337 7. Chan JF, Yuan S, Kok KH, To KK, Chu H, Yang J, et al. A familial cluster of pneumonia associated  
338 with the 2019 novel coronavirus indicating person-to-person transmission: a study of a family cluster.  
339 *Lancet (London, England)*. 2020;395(10223):514-23.
- 340 8. Duan K, Liu B, Li C, Zhang H, Yu T, Qu J, et al. Effectiveness of convalescent plasma therapy in  
341 severe COVID-19 patients. *Proceedings of the National Academy of Sciences of the United States of*  
342 *America*. 2020;117(17):9490-6.
- 343 9. Burton R, Kim S, Patel R, Scola M, Hartman D, Tracey D, et al. Serum and colostral antibody  
344 production in cows immunized with recombinant human tumor necrosis factor. *Journal of dairy science*.  
345 2016;99(6):4739-49.
- 346 10. Korhonen HJ, Marnila P. 10 - Bovine milk immunoglobulins against microbial human diseases. In:  
347 Corredig M, editor. *Dairy-Derived Ingredients*: Woodhead Publishing; 2009. p. 269-89.
- 348 11. Weiner C, Pan Q, Hurtig M, Borén T, Bostwick E, Hammarström L. Passive immunity against  
349 human pathogens using bovine antibodies. *Clinical and experimental immunology*. 1999;116(2):193-205.
- 350 12. Ebina T, Sato A, Umezū K, Ishida N, Ohyama S, Ohizumi A, et al. Prevention of rotavirus infection  
351 by cow colostrum antibody against human rotaviruses. *Lancet (London, England)*. 1983;2(8357):1029-30.
- 352 13. Yolken RH, Losonsky GA, Vonderfecht S, Leister F, Wee SB. Antibody to human rotavirus in cow's  
353 milk. *The New England journal of medicine*. 1985;312(10):605-10.
- 354 14. Florén CH, Chinenye S, Elfstrand L, Hagman C, Ihse I. ColoPlus, a new product based on bovine  
355 colostrum, alleviates HIV-associated diarrhoea. *Scandinavian journal of gastroenterology*.  
356 2006;41(6):682-6.
- 357 15. Patrick Olwedo Odong PJA, James Obol, Claes-Henrik Florén. Management of HIV in Children  
358 Using a Bovine Colostrum-Based Food Product— An Observational Field Study. *World Journal of AIDS*.  
359 2015;5(2).
- 360 16. Xu ML, Kim HJ, Wi GR, Kim HJ. The effect of dietary bovine colostrum on respiratory syncytial  
361 virus infection and immune responses following the infection in the mouse. *Journal of microbiology*  
362 (Seoul, Korea). 2015;53(9):661-6.
- 363 17. den Hartog G, Jacobino S, Bont L, Cox L, Ulfman LH, Leusen JH, et al. Specificity and Effector  
364 Functions of Human RSV-Specific IgG from Bovine Milk. *PloS one*. 2014;9(11):e112047.

- 365 18. Ng WC, Wong V, Muller B, Rawlin G, Brown LE. Prevention and treatment of influenza with  
366 hyperimmune bovine colostrum antibody. *PloS one*. 2010;5(10):e13622.
- 367 19. Kramski M, Center RJ, Wheatley AK, Jacobson JC, Alexander MR, Rawlin G, et al. Hyperimmune  
368 bovine colostrum as a low-cost, large-scale source of antibodies with broad neutralizing activity for HIV-  
369 1 envelope with potential use in microbicides. *Antimicrobial agents and chemotherapy*.  
370 2012;56(8):4310-9.
- 371 20. Ulfman LH, Leusen JHW, Savelkoul HFJ, Warner JO, van Neerven RJJ. Effects of Bovine  
372 Immunoglobulins on Immune Function, Allergy, and Infection. *Frontiers in nutrition*. 2018;5:52.
- 373 21. Hurley WL, Theil PK. Perspectives on immunoglobulins in colostrum and milk. *Nutrients*.  
374 2011;3(4):442-74.
- 375 22. Hessel AJ, Hangartner L, Hunter M, Havenith CE, Beurskens FJ, Bakker JM, et al. Fc receptor but  
376 not complement binding is important in antibody protection against HIV. *Nature*. 2007;449(7158):101-4.
- 377 23. An MJ, Cheon JH, Kim SW, Park JJ, Moon CM, Han SY, et al. Bovine colostrum inhibits nuclear  
378 factor kappaB-mediated proinflammatory cytokine expression in intestinal epithelial cells. *Nutrition  
379 research (New York, NY)*. 2009;29(4):275-80.
- 380 24. Rump JA, Arndt R, Arnold A, Bendick C, Dichtelmüller H, Franke M, et al. Treatment of diarrhoea  
381 in human immunodeficiency virus-infected patients with immunoglobulins from bovine colostrum. *The  
382 Clinical investigator*. 1992;70(7):588-94.
- 383 25. Ellens DJ, de Leeuw PW, Straver PJ. The detection of rotavirus specific antibody in colostrum and  
384 milk by ELISA. *Annales de recherches veterinaires Annals of veterinary research*. 1978;9(2):337-42.
- 385 26. Adar T, Ben Ya'acov A, Lalazar G, Lichtenstein Y, Nahman D, Mizrahi M, et al. Oral administration  
386 of immunoglobulin G-enhanced colostrum alleviates insulin resistance and liver injury and is associated  
387 with alterations in natural killer T cells. *Clinical and experimental immunology*. 2012;167(2):252-60.
- 388 27. Warny M, Fatimi A, Bostwick EF, Laine DC, Lebel F, LaMont JT, et al. Bovine immunoglobulin  
389 concentrate-clostridium difficile retains C difficile toxin neutralising activity after passage through the  
390 human stomach and small intestine. *Gut*. 1999;44(2):212-7.
- 391 28. Jasion VS, Burnett BP. Survival and digestibility of orally-administered immunoglobulin  
392 preparations containing IgG through the gastrointestinal tract in humans. *Nutrition journal*. 2015;14:22.
- 393 29. Cesarone MR, Belcaro G, Di Renzo A, Dugall M, Cacchio M, Ruffini I, et al. Prevention of influenza  
394 episodes with colostrum compared with vaccination in healthy and high-risk cardiovascular subjects: the  
395 epidemiologic study in San Valentino. *Clinical and applied thrombosis/hemostasis : official journal of the  
396 International Academy of Clinical and Applied Thrombosis/Hemostasis*. 2007;13(2):130-6.
- 397 30. Parvathaneni V, Gupta V. Utilizing drug repurposing against COVID-19 - Efficacy, limitations, and  
398 challenges. *Life sciences*. 2020;259:118275.
- 399 31. Zeugung EPÜdVu. *Zeitschrift für Hygiene und Infektionskrankheiten*. 1892;12:183-203.
- 400 32. Butler JE. Immunoglobulin diversity, B-cell and antibody repertoire development in large farm  
401 animals. *Revue scientifique et technique (International Office of Epizootics)*. 1998;17(1):43-70.
- 402 33. Korhonen H, Marnila P, Gill HS. Bovine milk antibodies for health. *The British journal of nutrition*.  
403 2000;84 Suppl 1:S135-46.
- 404 34. Jawhara S. Can Drinking Microfiltered Raw Immune Milk From Cows Immunized Against SARS-  
405 CoV-2 Provide Short-Term Protection Against COVID-19? *Frontiers in immunology*. 2020;11:1888.
- 406 35. Campbell B. PWE. Immune milk-A historical survey. *Dairy Sci*. 1963;25:345-58.
- 407 36. Gingerich DA, McPhillips CA. Analytical approach to determination of safety of milk ingredients  
408 from hyperimmunized cows. *Regulatory toxicology and pharmacology : RTP*. 2005;41(2):102-12.
- 409 37. Krissansen GW. Emerging health properties of whey proteins and their clinical implications.  
410 *Journal of the American College of Nutrition*. 2007;26(6):713s-23s.



- 411 38. Hashemi SA, Golab Behbahan NG, Bahrani S, Mousavi SM, Gholami A, Ramakrishna S, et al.  
412 Ultra-sensitive viral glycoprotein detection NanoSystem toward accurate tracing SARS-CoV-2 in  
413 biological/non-biological media. *Biosensors & bioelectronics*. 2021;171:112731.
- 414 39. Le Bras A. Syrian hamsters as a small animal model for COVID-19 research. *Lab animal*.  
415 2020;49(8):223.
- 416 40. Imai M, Iwatsuki-Horimoto K, Hatta M, Loeber S, Halfmann PJ, Nakajima N, et al. Syrian  
417 hamsters as a small animal model for SARS-CoV-2 infection and countermeasure development.  
418 *Proceedings of the National Academy of Sciences of the United States of America*. 2020;117(28):16587-  
419 95.
- 420
